# Supplementary material
Source: publisher site journal article supplement (https://www.dovepress.com/article/434989)
Supplement: Supplementary file 1 [file get_supplementary_file.php]

**Legend****Model1** - without covariate correction**Model2** - corrected for sex, age and tobacco smoking status**Model3** - corrected for sex, age, tobacco smoking status, diabetes mellitus and hypertension**Supplementary Table 1**

| Protein       | Uniprot ID | model1_coefficien | model1_pvalue | model2_coefficien | model2_pvalue |
|---------------|------------|-------------------|---------------|-------------------|---------------|
| IL-2RB        | P14784     | -0.2074015        | 0.00536044    | -0.2044712        | 0.00717794    |
| IL-22RA1      | Q8N6P7     | 0.30131742        | 0.0040253     | 0.28357           | 0.00797375    |
| TWEAK         | O43508     | -0.1697901        | 0.00573001    | -0.1532155        | 0.01346396    |
| CX3CL1        | P78423     | -0.12401          | 0.05174692    | -0.165444         | 0.00882109    |
| CD6           | Q8WWJ7     | -0.1866935        | 0.02500671    | -0.1967279        | 0.02097468    |
| CD5           | P06127     | -0.1123583        | 0.06072401    | -0.1360542        | 0.02515249    |
| LAP TGF-beta1 | P01137     | -0.1322654        | 0.06567925    | -0.1360412        | 0.06290613    |
| LIF-R         | P42702     | -0.050018         | 0.24666346    | -0.0759543        | 0.07715522    |
| TRAIL         | P50591     | -0.0832005        | 0.18955286    | -0.1370691        | 0.02659984    |
| NT-3          | P20783     | -0.1193888        | 0.04156997    | -0.128493         | 0.03015393    |
| CCL23         | P55773     | -0.1301902        | 0.12349114    | -0.1698479        | 0.04399408    |
| IL4           | P05112     | -0.1641334        | 0.16076705    | -0.2098463        | 0.07738771    |
| IL-17A        | Q16552     | -0.0415327        | 0.47834373    | -0.0983832        | 0.07862681    |
| TRANCE        | O14788     | -0.3003205        | 0.0330619     | -0.2367457        | 0.08417863    |
| IL33          | O95760     | -0.0777619        | 0.17534225    | -0.1007575        | 0.08236795    |
| uPA           | P00749     | -0.05885          | 0.31162137    | -0.1070467        | 0.0600881     |
| CCL20         | P78556     | 0.41824912        | 0.01436991    | 0.37012466        | 0.03157188    |
| MCP-2         | P80075     | -0.1835417        | 0.18980269    | -0.2767245        | 0.04387402    |
| NRTN          | Q99748     | -0.1572787        | 0.14731811    | -0.1901157        | 0.08555266    |
| DNER          | Q8NFT8     | -0.0799597        | 0.08731467    | -0.091749         | 0.04689522    |
| ST1A1         | P50225     | 0.26704772        | 0.13543312    | 0.26509349        | 0.14810449    |
| IL10          | P22301     | 0.11853018        | 0.09267052    | 0.12258564        | 0.08708871    |
| IL-18R1       | Q13478     | -0.0797171        | 0.48866028    | -0.1697372        | 0.12874149    |
| CD244         | Q9BZW8     | -0.0846813        | 0.18550557    | -0.0808871        | 0.21590627    |
| Beta-NGF      | P01138     | -0.0358424        | 0.12956878    | -0.0299913        | 0.21023312    |
| IL-20RA       | Q9UHF4     | -0.1322006        | 0.12189741    | -0.1227227        | 0.15720609    |
| ARTN          | Q5T4W7     | 0.15795373        | 0.087777711   | 0.14315445        | 0.12945322    |
| IL-17C        | Q9P0M4     | 0.26942268        | 0.03570392    | 0.22173571        | 0.08638134    |
| CCL3          | P10147     | 0.00852367        | 0.94137951    | -0.0966121        | 0.37690015    |
| MMP-1         | P03956     | -0.1913937        | 0.21977743    | -0.2402111        | 0.12477147    |
| PD-L1         | Q9NZQ7     | -0.0649949        | 0.41286721    | -0.1026403        | 0.19731434    |
| CSF-1         | P09603     | -0.010027         | 0.80318722    | -0.0399923        | 0.3062501     |
| TNFRSF9       | Q07011     | -0.0266567        | 0.73656732    | -0.0958159        | 0.2092457     |
| IL-10RB       | Q08334     | -0.2352816        | 0.14472695    | -0.222477         | 0.1779449     |
| CD8A          | P01732     | -0.1594398        | 0.21273795    | -0.1199065        | 0.35192837    |
| CD40          | P25942     | 0.0118765         | 0.85000051    | -0.0535645        | 0.35508117    |
| CCL4          | P13236     | -0.0589695        | 0.62597762    | -0.10887          | 0.36524568    |
| OPG           | O00300     | 0.03422632        | 0.64105883    | -0.0554249        | 0.38672198    |
| FGF-5         | Q8NF90     | 0.0076765         | 0.87044405    | -0.0443772        | 0.29537612    |
| IL-15RA       | Q13261     | -0.1638164        | 0.35132631    | -0.1988758        | 0.26466119    |
| IFN-gamma     | P01579     | 0.20313037        | 0.24569596    | 0.18086491        | 0.30785798    |
| SCF           | P21583     | -0.1005694        | 0.16793232    | -0.0868413        | 0.23189293    |

|                  |        |            |            |            |            |
|------------------|--------|------------|------------|------------|------------|
| <b>FGF-19</b>    | O95750 | 0.16192027 | 0.33602024 | 0.12357727 | 0.47027889 |
| <b>IL7</b>       | P13232 | -0.0895784 | 0.31495369 | -0.0695814 | 0.44254304 |
| <b>CCL11</b>     | P51671 | 0.15971804 | 0.06724234 | 0.0649087  | 0.41822906 |
| <b>TNFB</b>      | P01374 | -0.111168  | 0.198556   | -0.0664967 | 0.44088405 |
| <b>LIF</b>       | P15018 | -0.1159187 | 0.31335626 | -0.107271  | 0.36086199 |
| <b>CXCL1</b>     | P09341 | -0.0572663 | 0.56615265 | -0.051889  | 0.60683478 |
| <b>IL-20</b>     | Q9NYY1 | -0.0684359 | 0.38427165 | -0.0677037 | 0.39914617 |
| <b>CXCL11</b>    | O14625 | -0.0300244 | 0.8405368  | -0.0966836 | 0.50192505 |
| <b>BP1</b>       | Q13541 | 0.22819475 | 0.10778153 | 0.13527379 | 0.33445306 |
| <b>MMP-10</b>    | P09238 | 0.12228295 | 0.36053465 | 0.08903553 | 0.50692092 |
| <b>MCP-1</b>     | P13500 | 0.16168832 | 0.06127696 | 0.06958551 | 0.38326977 |
| <b>SLAMF1</b>    | Q13291 | 0.03331311 | 0.6333081  | -0.0295637 | 0.65972153 |
| <b>IL-24</b>     | Q13007 | -0.0478064 | 0.70130624 | -0.0852391 | 0.50320961 |
| <b>IL-1alpha</b> | P01583 | -0.012936  | 0.83194995 | -0.0279048 | 0.63932071 |
| <b>CCL25</b>     | O15444 | 0.18560416 | 0.10527908 | 0.084365   | 0.44617397 |
| <b>CASP-8</b>    | Q14790 | 0.11248604 | 0.12184057 | 0.05234022 | 0.45838046 |
| <b>CST5</b>      | P28325 | -0.0157032 | 0.86260227 | -0.0763642 | 0.38137082 |
| <b>IL2</b>       | P60568 | -0.0285158 | 0.48443327 | -0.027159  | 0.51551102 |
| <b>IL5</b>       | P05113 | -0.1567404 | 0.5049552  | -0.1333394 | 0.57502894 |
| <b>CCL19</b>     | Q99731 | 0.24989678 | 0.12920182 | 0.13374614 | 0.40861021 |
| <b>IL-12B</b>    | P29460 | 0.04111084 | 0.44471494 | -0.0134899 | 0.78996279 |
| <b>ADA</b>       | P00813 | -0.0131303 | 0.84461173 | -0.0450364 | 0.48961685 |
| <b>MCP-3</b>     | P80098 | 0.17855966 | 0.10439754 | 0.0919798  | 0.38240323 |
| <b>AXIN1</b>     | O15169 | 0.07218153 | 0.49826972 | 0.04937444 | 0.64878274 |
| <b>EN-RAGE</b>   | P80511 | 0.07360255 | 0.57775543 | 0.05506205 | 0.68332313 |
| <b>TGF-alpha</b> | P01135 | 0.10542255 | 0.36129472 | 0.08145027 | 0.47572144 |
| <b>IL-10RA</b>   | Q13651 | 0.12363276 | 0.22435879 | 0.05584024 | 0.57929166 |
| <b>HGF</b>       | P14210 | 0.08986265 | 0.28773464 | 0.01566694 | 0.8471686  |
| <b>CXCL6</b>     | P80162 | 0.11207892 | 0.33766582 | 0.09936388 | 0.40603139 |
| <b>FGF-23</b>    | Q9GZV9 | 0.07602944 | 0.47856395 | 0.08058223 | 0.45110927 |
| <b>CXCL9</b>     | Q07325 | 0.22599566 | 0.10068326 | 0.07950118 | 0.4922435  |
| <b>TSLP</b>      | Q969D9 | 0.0729457  | 0.5782665  | 0.06259325 | 0.64031871 |
| <b>CCL28</b>     | Q9NRJ3 | 0.01956031 | 0.84304541 | -0.0469494 | 0.61357387 |
| <b>IL13</b>      | P35225 | 0.07155375 | 0.31601389 | 0.02949624 | 0.6743319  |
| <b>TNFSF14</b>   | O43557 | 0.02212468 | 0.83869868 | -0.0137515 | 0.89944531 |
| <b>CXCL5</b>     | P42830 | 0.04626124 | 0.73798625 | -0.0057355 | 0.96513419 |
| <b>CXCL10</b>    | P02778 | 0.20325902 | 0.21802549 | 0.09469502 | 0.54824889 |
| <b>VEGFA</b>     | P15692 | 0.09819457 | 0.40187515 | 0.02092183 | 0.85540089 |
| <b>GNDF</b>      | P39905 | 0.04425858 | 0.50754986 | -0.0064587 | 0.91938467 |
| <b>STAMBP</b>    | O95630 | 0.01825271 | 0.82531191 | -0.0157914 | 0.85016405 |
| <b>IL6</b>       | P05231 | 0.25915809 | 0.10185155 | 0.1396906  | 0.36503896 |
| <b>MCP-4</b>     | Q99616 | 0.10794487 | 0.35085413 | 0.01392669 | 0.89926813 |
| <b>Flt3L</b>     | P49771 | 0.12098141 | 0.17451173 | 0.00464077 | 0.95149954 |
| <b>CDCP1</b>     | Q9H5V8 | 0.22156994 | 0.08985479 | 0.01810433 | 0.85798771 |
| <b>IL18</b>      | Q14116 | 0.06741038 | 0.31256023 | 0.00505677 | 0.93648237 |
| <b>SIRT2</b>     | Q8IXJ6 | 0.02965235 | 0.74230792 | 0.00024051 | 0.99790163 |
| <b>FGF-21</b>    | Q9NSA1 | 0.3308069  | 0.1946128  | 0.15181543 | 0.54765653 |
| <b>IL8</b>       | P10145 | 0.15815851 | 0.13440359 | 0.04508464 | 0.64692938 |

|            |        |            |            |           |            |
|------------|--------|------------|------------|-----------|------------|
| <b>OSM</b> | P13725 | 0.07740849 | 0.57713629 | 0.0412807 | 0.76613101 |
| <b>TNF</b> | P01375 | 0.08812872 | 0.25043181 | 0.0246531 | 0.73583234 |

| <b>model3_coeficien</b> | <b>model3_pvalue</b> |
|-------------------------|----------------------|
| -0.2153216              | 0.00524843           |
| 0.2941946               | 0.00669126           |
| -0.145877               | 0.02012613           |
| -0.1447727              | 0.02109213           |
| -0.1936454              | 0.02522431           |
| -0.1371594              | 0.02553859           |
| -0.1625931              | 0.0264601            |
| -0.0907537              | 0.03498715           |
| -0.1283632              | 0.04024214           |
| -0.1207385              | 0.04421601           |
| -0.1684766              | 0.04823507           |
| -0.2285804              | 0.05749903           |
| -0.1055388              | 0.06285669           |
| -0.2560033              | 0.06557591           |
| -0.1072853              | 0.06835797           |
| -0.1041709              | 0.0710786            |
| 0.30259458              | 0.07769049           |
| -0.238146               | 0.08263083           |
| -0.1877704              | 0.09336217           |
| -0.0760494              | 0.09960215           |
| 0.3037625               | 0.1012921            |
| 0.11662814              | 0.10841558           |
| -0.1772253              | 0.11829062           |
| -0.1020314              | 0.12044347           |
| -0.0360312              | 0.13588436           |
| -0.1288301              | 0.14348728           |
| 0.13881062              | 0.14753659           |
| 0.18778246              | 0.14860571           |
| -0.1519922              | 0.15859515           |
| -0.2228824              | 0.15890984           |
| -0.1109807              | 0.1694885            |
| -0.0511777              | 0.19162311           |
| -0.1000604              | 0.19529027           |
| -0.2082107              | 0.21403611           |
| -0.1520264              | 0.24226898           |
| -0.0669041              | 0.25298312           |
| -0.132534               | 0.27610718           |
| -0.0697729              | 0.27792894           |
| -0.0461944              | 0.28343287           |
| -0.1875507              | 0.30010092           |
| 0.17718063              | 0.32532336           |
| -0.0693492              | 0.33941322           |

|            |            |
|------------|------------|
| 0.16384507 | 0.34319849 |
| -0.085026  | 0.35400834 |
| 0.07262254 | 0.37079046 |
| -0.0771898 | 0.37728934 |
| -0.103987  | 0.38314605 |
| -0.0828352 | 0.41395943 |
| -0.0662164 | 0.41672501 |
| -0.1154328 | 0.42641117 |
| 0.10935335 | 0.43930888 |
| 0.10506672 | 0.43999988 |
| 0.06064996 | 0.45305786 |
| -0.0480807 | 0.47743307 |
| -0.0881311 | 0.4930232  |
| -0.0411487 | 0.49412385 |
| 0.07347854 | 0.51085327 |
| 0.04689678 | 0.51119726 |
| -0.054272  | 0.53718411 |
| -0.0257651 | 0.54354678 |
| -0.1437898 | 0.55157481 |
| 0.09289325 | 0.56736444 |
| -0.0283159 | 0.57789994 |
| -0.0332497 | 0.61411125 |
| 0.05263152 | 0.61659522 |
| 0.0549202  | 0.61741149 |
| 0.06803165 | 0.61930732 |
| 0.05711103 | 0.6206245  |
| 0.04801955 | 0.63753385 |
| -0.0357374 | 0.65101012 |
| 0.0510857  | 0.66657352 |
| 0.04522648 | 0.6733366  |
| 0.04361948 | 0.70593706 |
| 0.05062    | 0.7080565  |
| -0.0340821 | 0.71745516 |
| 0.02523917 | 0.7232241  |
| -0.0360539 | 0.74323399 |
| -0.0408178 | 0.75762975 |
| 0.04395688 | 0.78137859 |
| -0.0291498 | 0.79833623 |
| -0.0156528 | 0.80777304 |
| -0.0176555 | 0.83524498 |
| 0.02604151 | 0.8595156  |
| 0.01139951 | 0.9187221  |
| 0.0062272  | 0.93595274 |
| -0.0080861 | 0.93672851 |
| -0.0042019 | 0.9478916  |
| 0.00507986 | 0.95630797 |
| -0.0064156 | 0.9791413  |
| -0.0021374 | 0.98228015 |

|            |            |
|------------|------------|
| -0.0020229 | 0.98842958 |
| 0.00080454 | 0.99123797 |
